# Supplementary figures and images for: The Organization of the Golgi Structures during Drosophila Male Meiosis Requires the Citrate Lyase ATPCL
Source: MDPI journal article supplement (doi:10.3390/ijms22115745), 2021-05-27

*DmATPCL*<sup>01466</sup>/  
*Df(2R)Exel7138*

*Oregon R*

LVA

DAPI

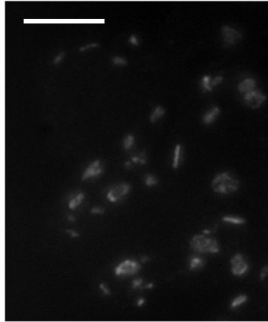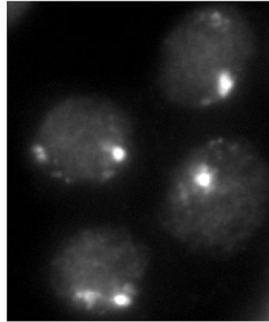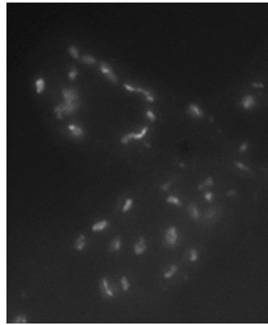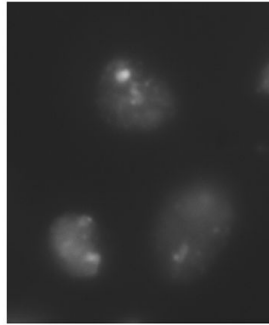

Supplement: s1 [file s1]
